# Supplementary material for: Trinuclear Cd3O14 hexaborate and two nickel borates based on molten salt synthesis and precursor synthesis: structure, characterization, and properties
Source: Royal Society of Chemistry journal article supplement (doi:10.1039/d0dt02235g), 2020-01-01
Supplement: d0dt02235g1.pdf [file d0dt02235g1.pdf]

## Supporting Information

### A trinuclear $\text{Cd}_3\text{O}_{14}$ hexaborate and two nickel borates based on molten salt synthesis and precursor synthesis: structure, characterization, and property

Yong He,<sup>a</sup> Ying Liu,<sup>a</sup> Shu-Sheng Xin,<sup>a</sup> Chun-Yang Pan<sup>\*a</sup>

<sup>a</sup>*School of Chemical Engineering and Light Industry, Guangdong University of Technology, Guangzhou, Guangdong 510006, China; Tel: +86-020-39322231 Fax: +86-020-39322231.*

\*Corresponding author: Chun-Yang Pan, E-mail: [panchuny@gdut.edu.cn](mailto:panchuny@gdut.edu.cn)

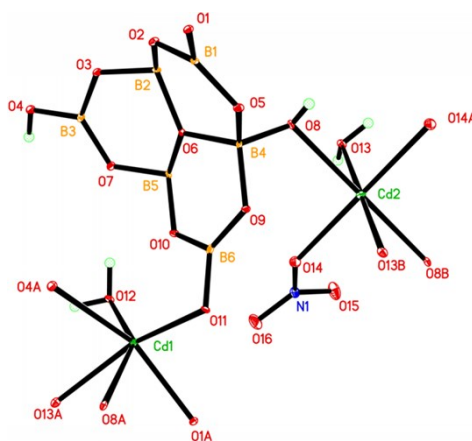

**Figure S1** Asymmetric unit of **1**, showing the atom-labeling scheme and 30% thermal ellipsoids. Atom labels having “A” refer to symmetry-generated.

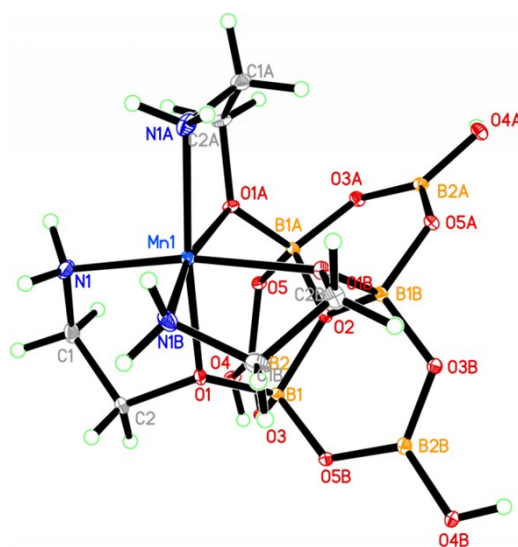

**Figure S2** Asymmetric unit of **2**, showing the atom-labeling scheme and 30% thermal

ellipsoids. Atom labels having “A” and “B” refer to symmetry-generated.

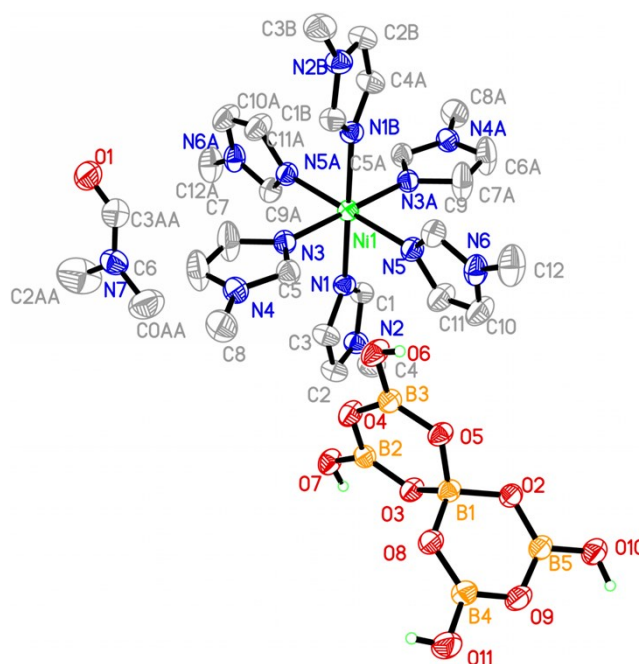

**Figure S3** Asymmetric unit of **3**, showing the atom-labeling scheme and 30% thermal ellipsoids. Atom labels having “A” refer to symmetry-generated, parts of split atoms were omitted for clarity.
